# Supplementary material
Source: PubMed Central journal article supplement (PMC9054746)
Supplement: 41421_2022_409_MOESM1_ESM.pdf [file 41421_2022_409_MOESM1_ESM.pdf]

Supplementary Figure 1

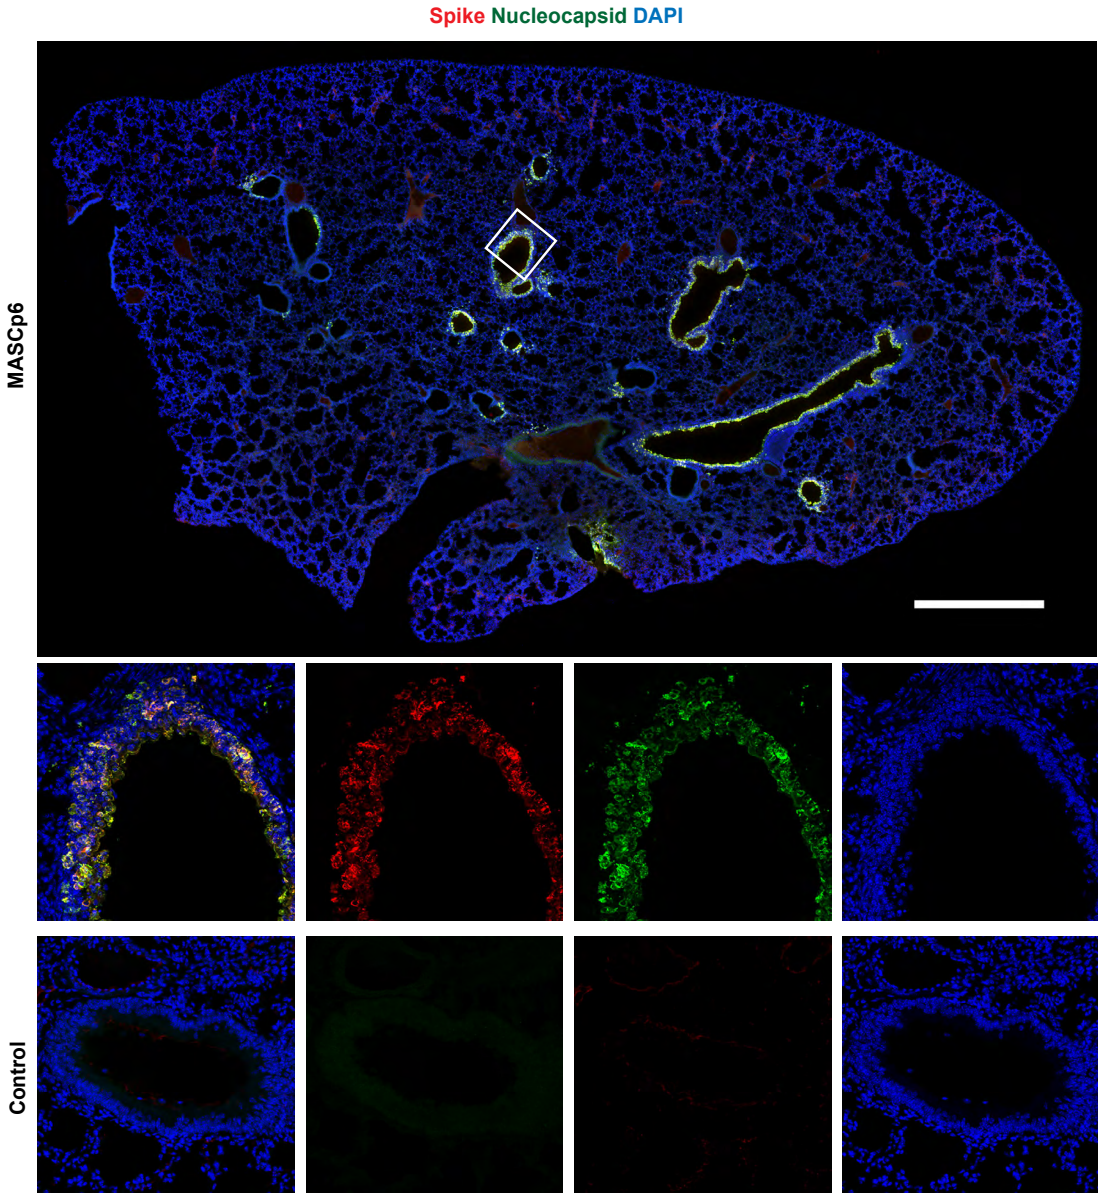

**Supplementary Fig. S1 Infection of mouse-adapted SARS-CoV-2 strain MASCP6 in trachea epithelial cells.** Immunostaining results of SARS-CoV-2 spike protein (red) and nucleocapsid protein (green) and DAPI (blue) in the lung sections of SARS-CoV-2 infected mice and control mice.

# Supplementary Figure 2

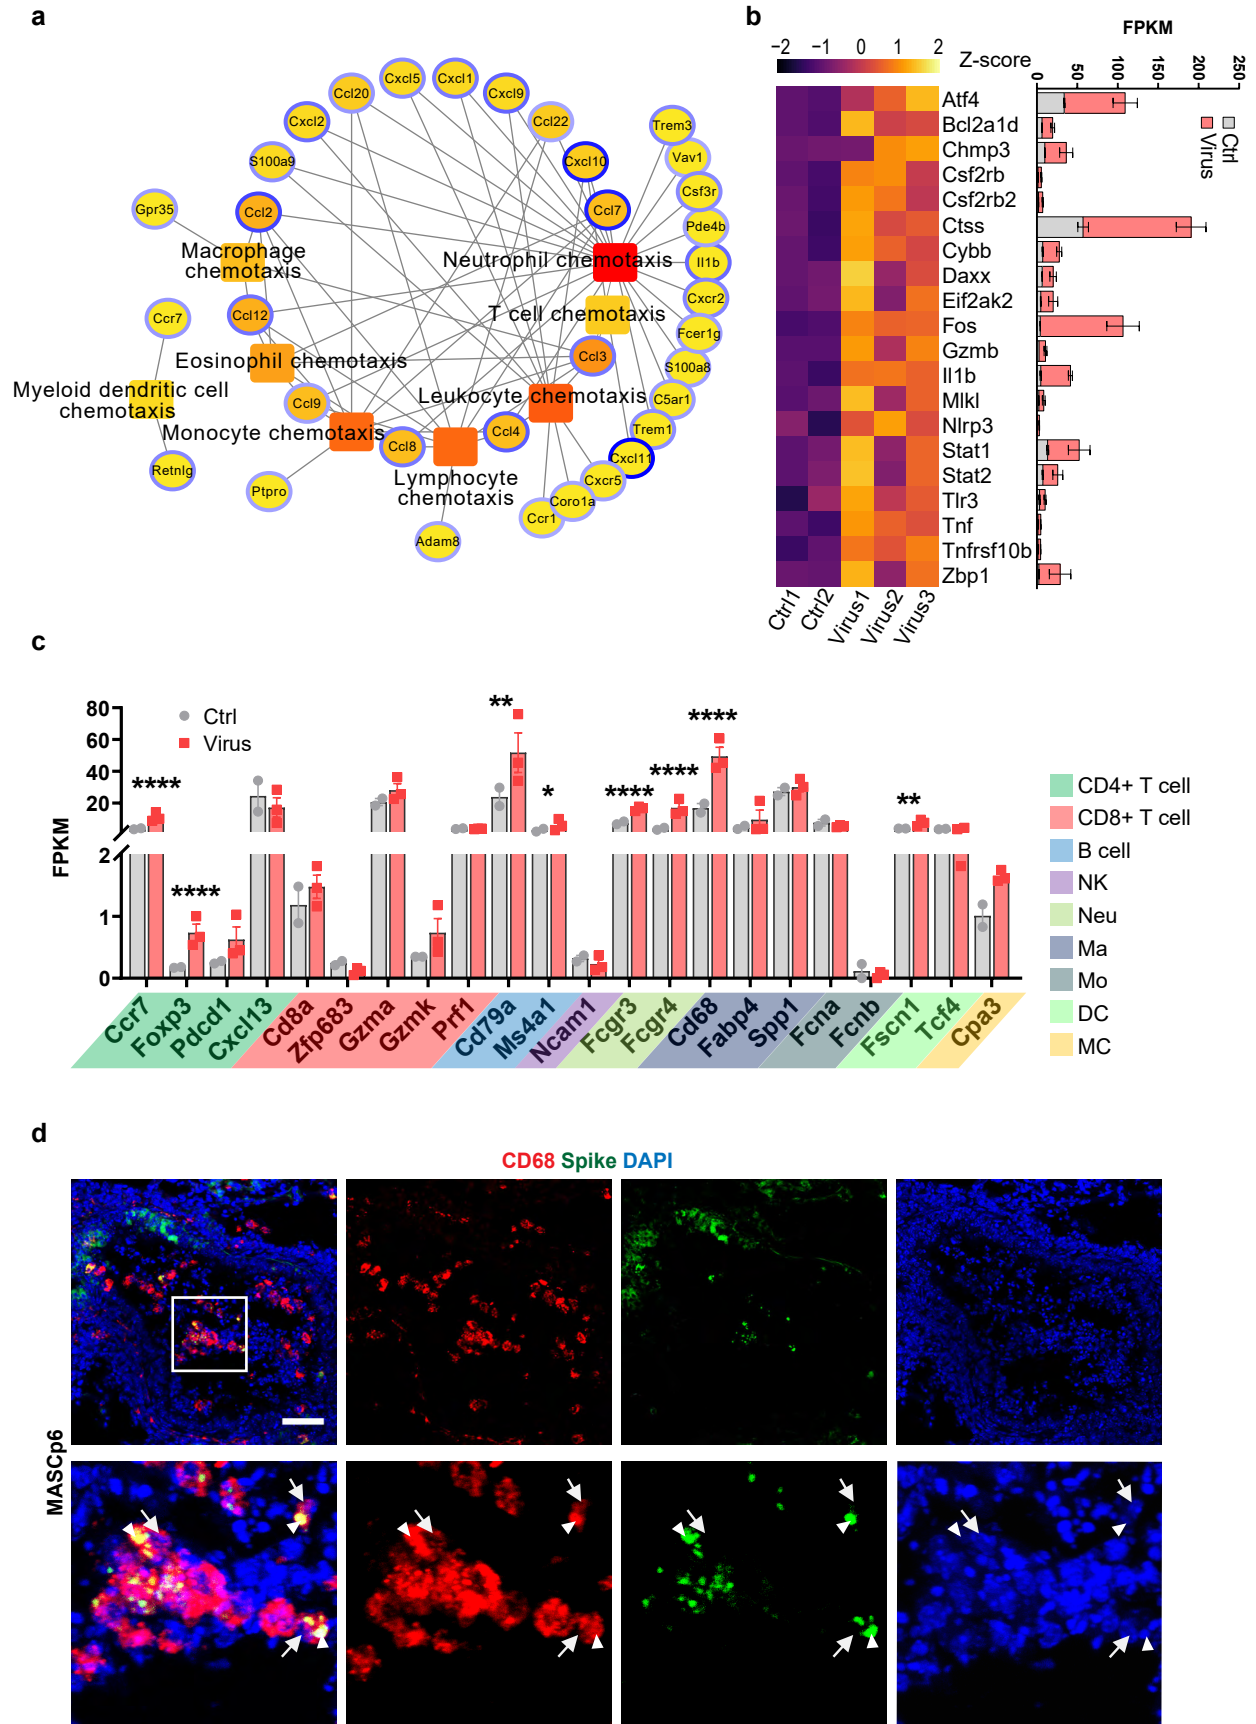

**Supplementary Fig. S2 Immune response of MASCP6-infected mouse lungs.** **a** Network of chemotaxis related genes grouped by GO terms of significantly upregulated genes. The fill color represents the number of related nodes: yellow (low) to red (high). The border color represents the fold change: light blue (low) to deep blue (high). **b** Heat map and bar plot show relative expression levels of significantly differently expressed genes involved in necroptosis and apoptosis. **c** Bar plot shows relative expression levels of some marker genes of immune cells. NK: natural killer cell; Neu: neutrophil; Ma: macrophage; Mo: monocyte; DC: dendritic cell; MC: mast cell. **d** Immunostaining results with SARS-CoV-2 spike (green) and macrophage marker (CD68, red) antibodies show virus infected cells were phagocytized by macrophage. Arrow: macrophages; Arrow head: infected cells. Scale bars, 50  $\mu$ m. All gene expression data are from RNAseq. All data showed as means  $\pm$  s.e.m. \*p < 0.05, \*\*p < 0.01, \*\*\*p < 0.001, \*\*\*\*p < 0.0001.



# Supplementary Figure 3

**a**

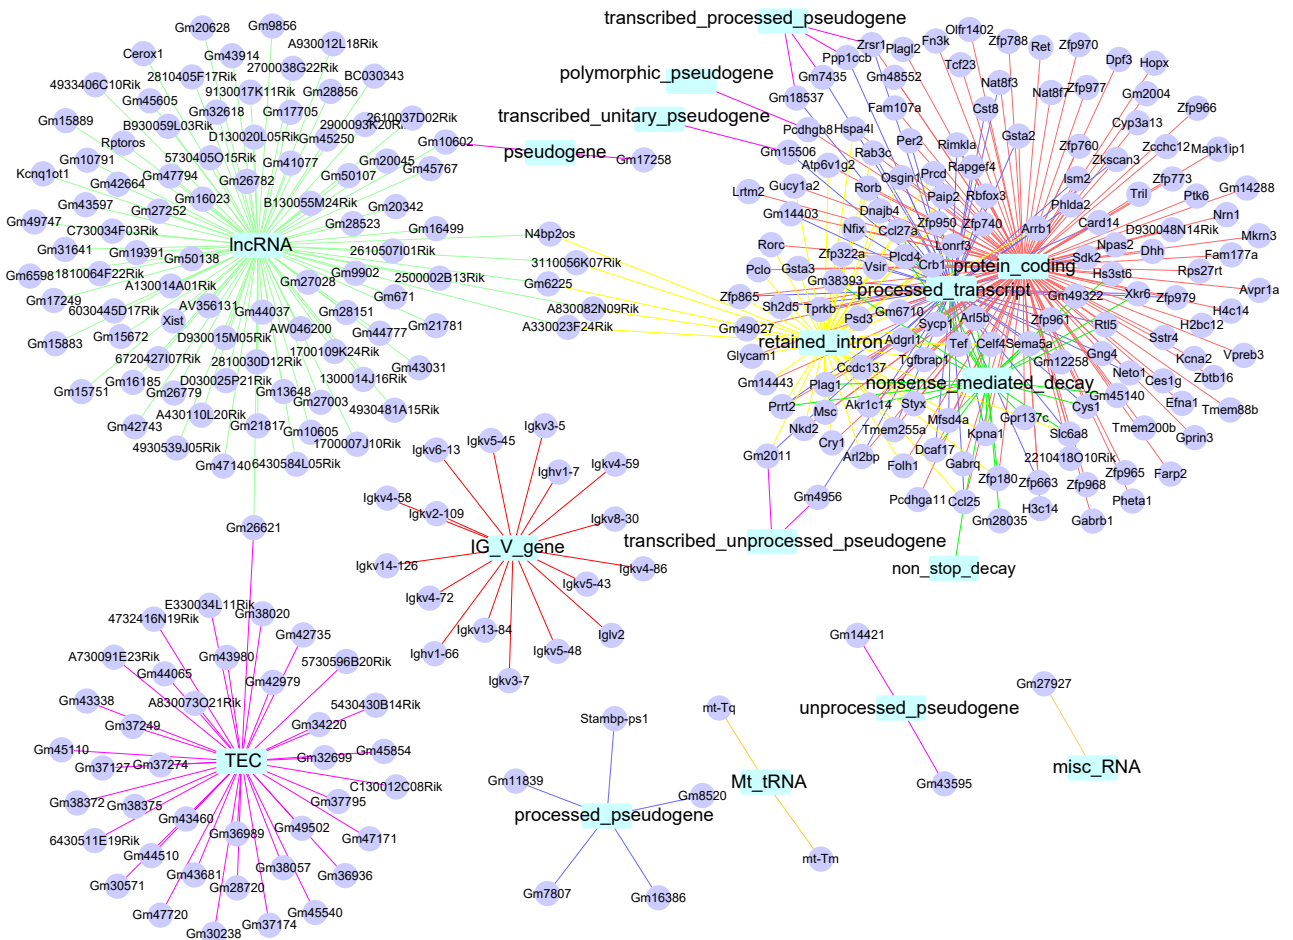

**b**

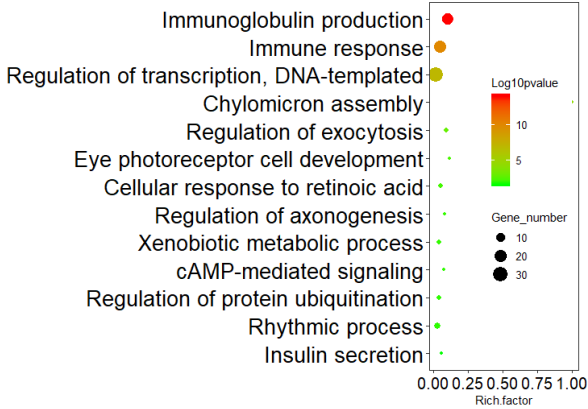

**c**

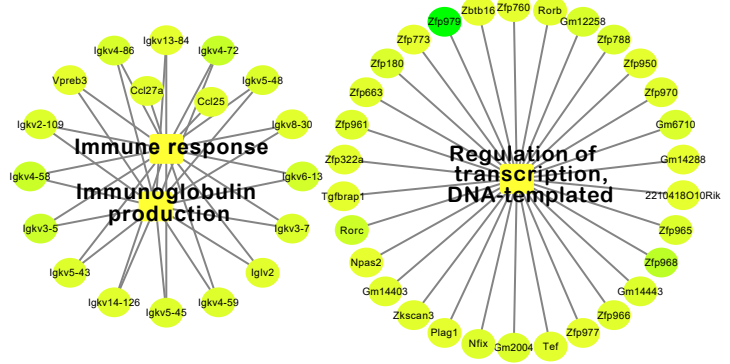

**Supplementary Fig. S3 Significantly downregulated genes of MASCP6-infected mouse lungs detected by RNAseq. a** Network of significantly downregulated genes grouped by gene biotype. **b** GO analysis of significantly downregulated genes. Rich factor represents the ratio of significantly differently expressed genes to the total genes belonged to the GO term. **c** Network of genes belonging to top3-enriched GO terms of significantly downregulated genes. The fill color represents the fold change: yellow (low) to green (high).

# Supplementary Figure 4

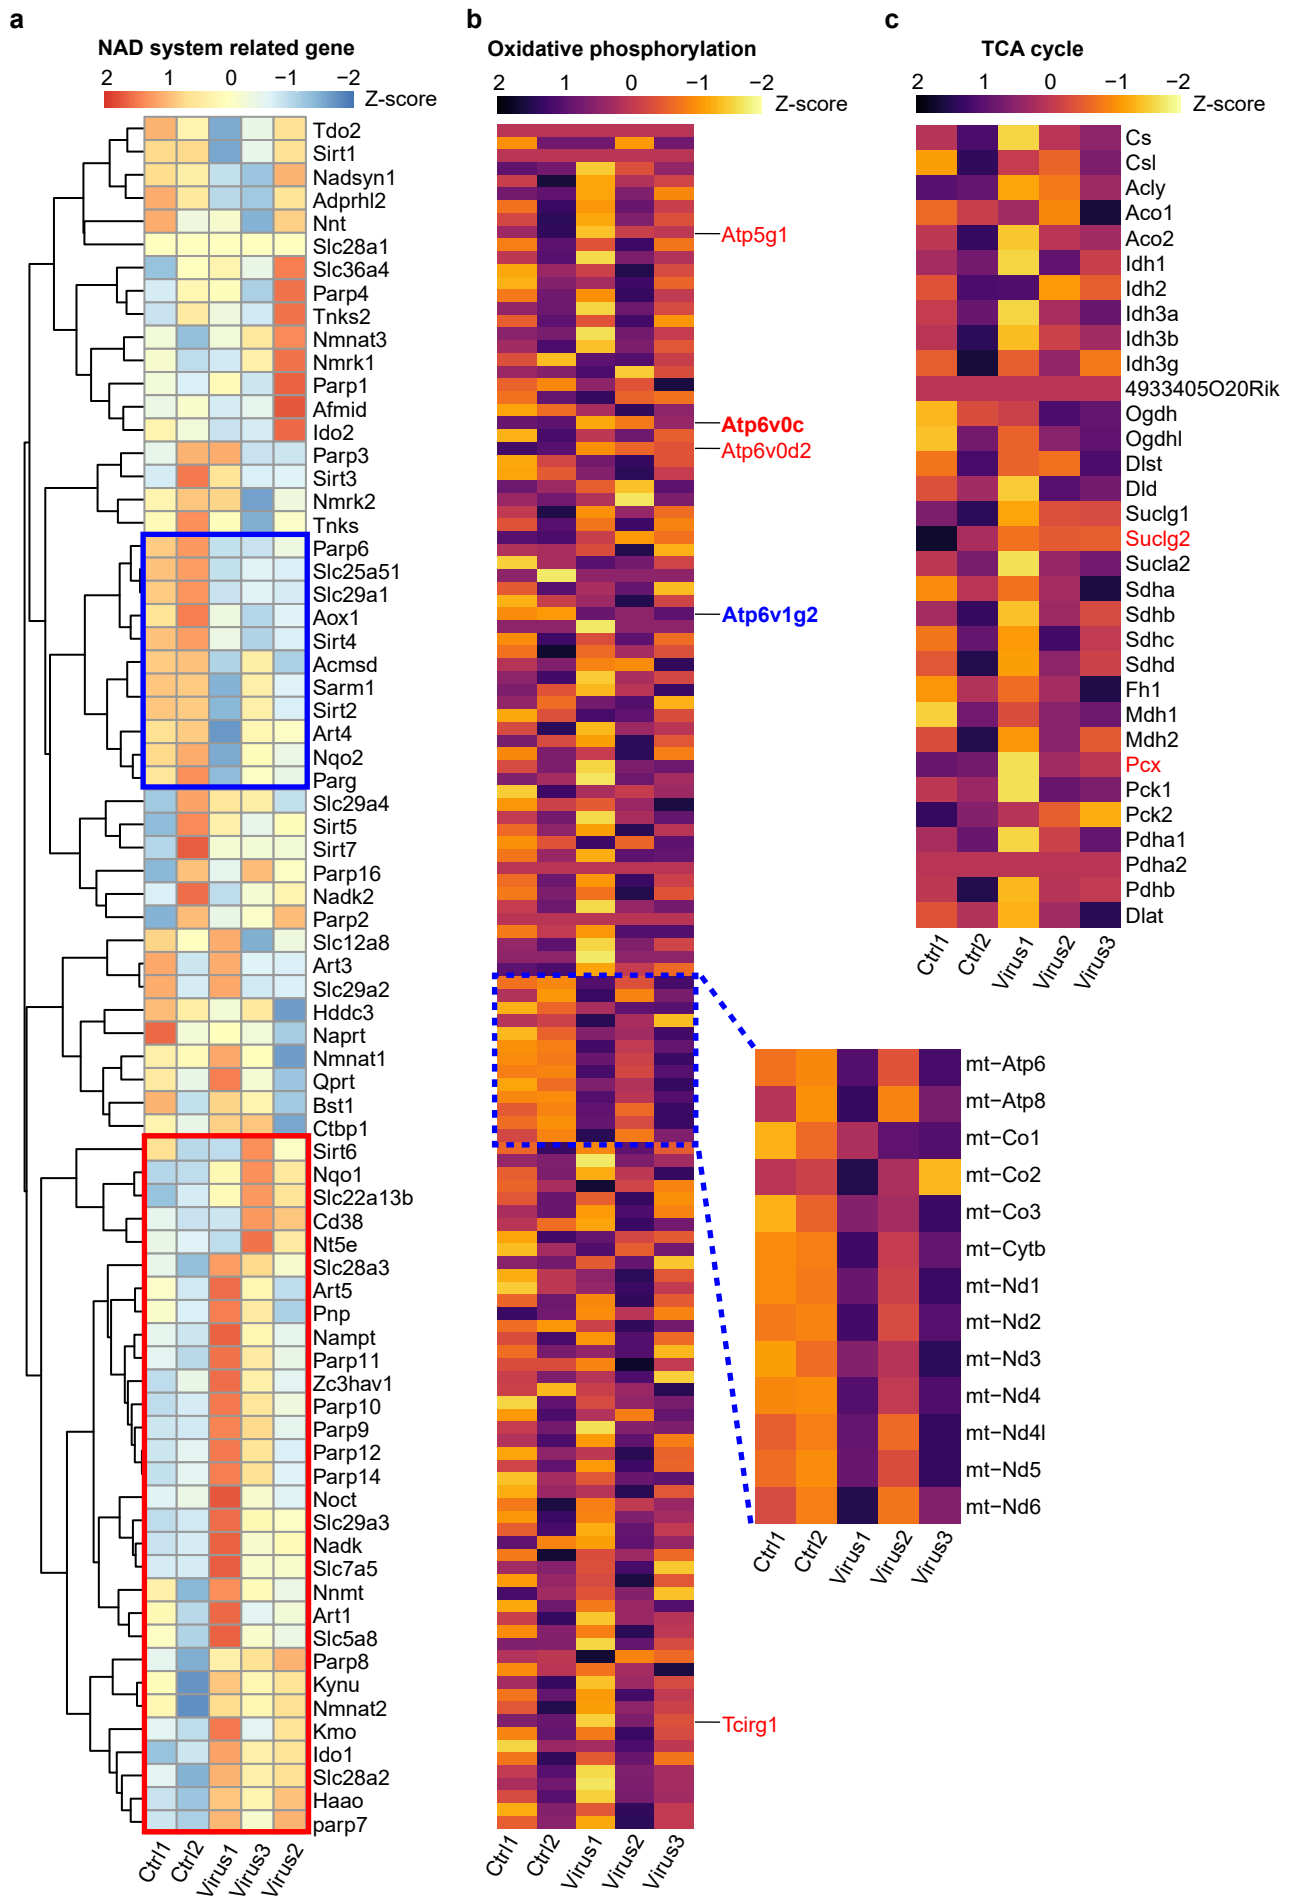

**Supplementary Fig. S4 Overview of relative expression levels of NAD<sup>+</sup> system and mitochondrion related genes detected by RNAseq in MASCP6-infected mice and control mice.** **a** Heat map shows relative expression levels of 74 genes belonging to NAD<sup>+</sup> system (Refer to Heer et al., 2020). Red border: genes significantly upregulated or tended to upregulated by MASCP6 infection. Blue border: genes significantly downregulated or tended to downregulated by MASCP6 infection. **b,c** Heat maps show relative expression levels of oxidative phosphorylation (**b**) and TCA cycle (**c**) related genes. Blue dotted box in (**b**): genes encoded by mitochondrial DNA. Red gene: upregulated by MASCP6 infection. Blue gene: downregulated by MASCP6 infection.

# Supplementary Figure 5

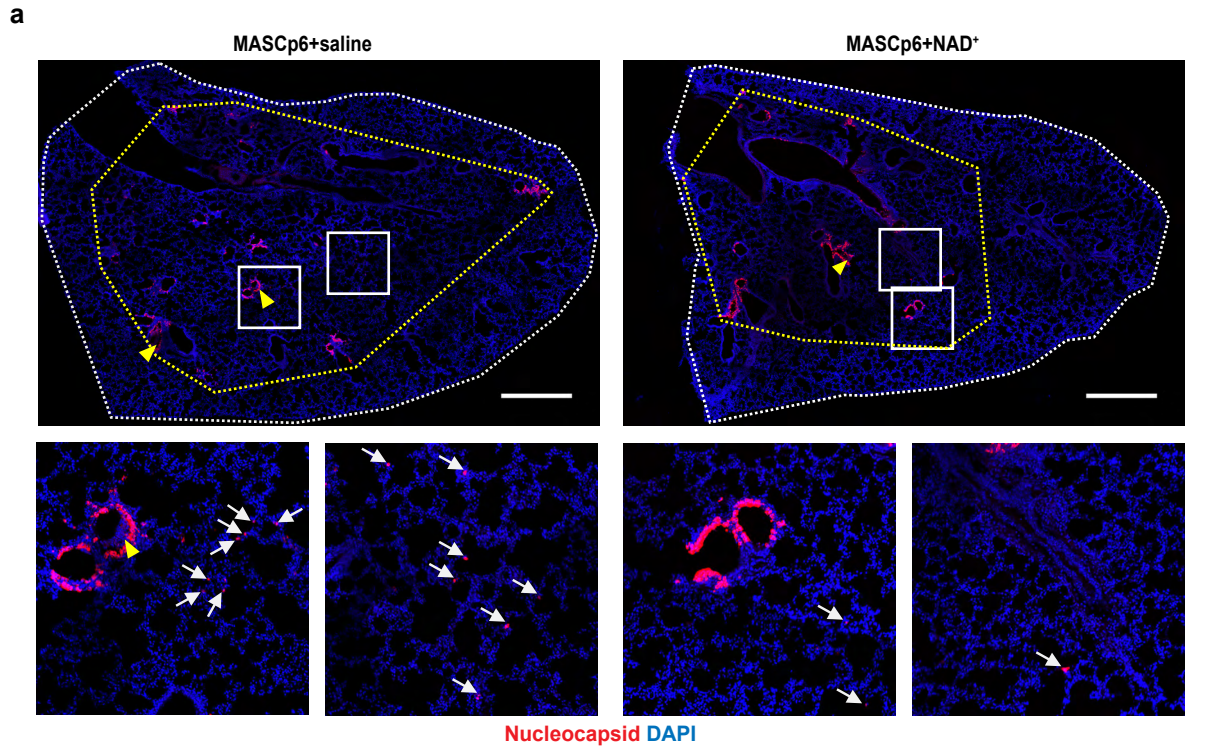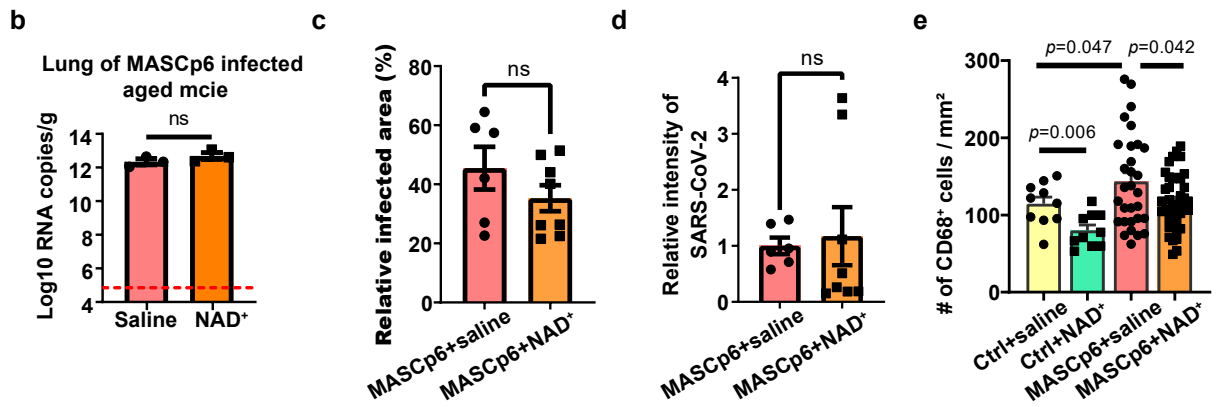

**Supplementary Fig. S5 NAD<sup>+</sup> supplementation has no effect on multiplication of MASCP6 in mice.** **a** Immunostaining results of SARS-CoV-2 nucleocapsid protein (red) and DAPI (blue) of lung sections from saline and NAD<sup>+</sup> administrated MASCP6-infected mice. Yellow arrow head: airway blockage; White arrow: virus infected alveolar epithelial cells; Yellow frame: virus infected area; white frame: total area. Scale bars, 1000  $\mu$ m. **b** Bar plot indicates the expression levels of viral RNA detected by qPCR in lungs of saline and NAD<sup>+</sup> administrated MASCP6-infected aged mice (8-9 months old). n = 3 mice per group. **c,d** Quantification of the relative fluorescence intensity (**c**) and infected area (**d**) of MASCP6. n = 3 mice for MASCP6 + saline group, n = 4 mice for MASCP6 + NAD<sup>+</sup> group. **e** Quantification of the density of CD68 positive cells of lung sections. n = 2 mice for Ctrl + saline group and Ctrl + NAD<sup>+</sup> group, n = 3 mice for MASCP6 + saline group, n = 4 mice for MASCP6 + NAD<sup>+</sup> group. All quantification data showed as means  $\pm$  s.e.m, t test. Exact p values are indicated.



# Supplementary Figure 6

a

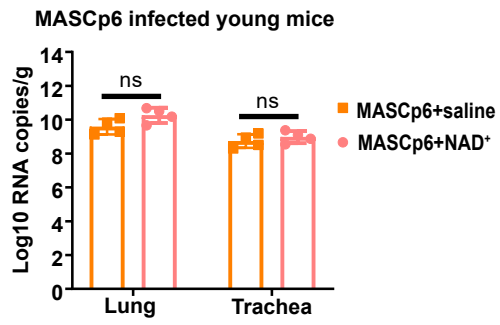

b

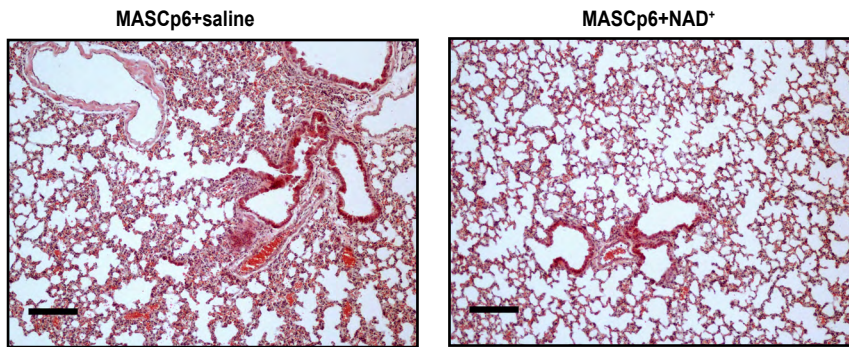

c

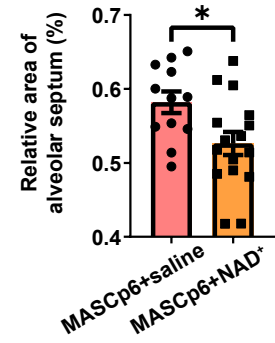

d

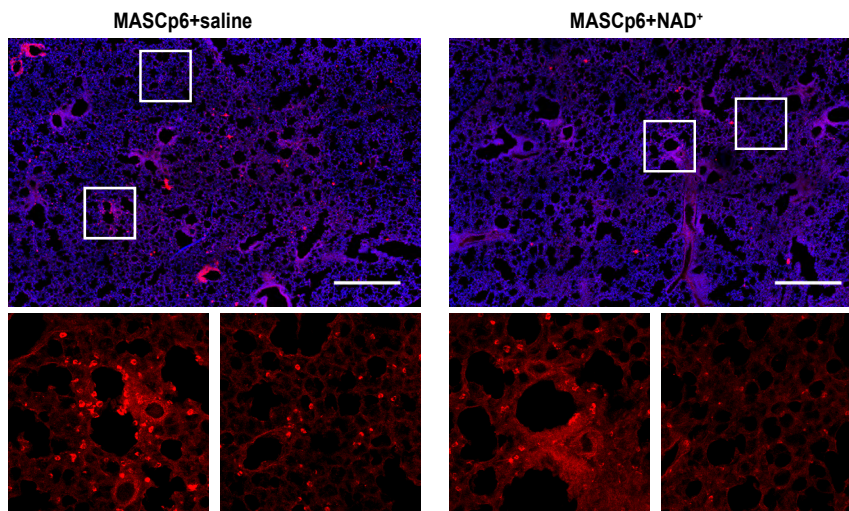

e

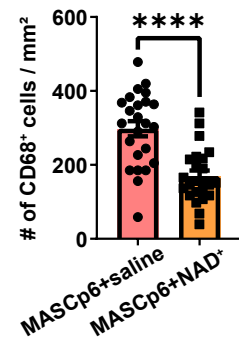

**Supplementary Fig. S6 Protective effect of NAD<sup>+</sup> supplementation for pathological changes caused MASCP6 infection in young mice (6-7 weeks old).** **a** Bar plot indicates the expression levels of viral RNA detected by qPCR in lungs and tracheas of saline and NAD<sup>+</sup> administrated MASCP6-infected mice respectively. **b** H&E staining results show alveolar septal thickening was rescued by NAD<sup>+</sup> supplementation in lung sections of saline and NAD<sup>+</sup> administrated MASCP6-infected mice. Scale bars, 200  $\mu$ m. **c** Quantification of the relative area of alveolar septum in lung sections from saline and NAD<sup>+</sup> administrated MASCP6-infected mice. **d** Immunostaining results with macrophage marker (CD68, red) antibody and DAPI (blue) show macrophage infiltration was rescued by NAD<sup>+</sup> supplementation in lung sections of saline and NAD<sup>+</sup> administrated MASCP6-infected mice. Scale bars, 500  $\mu$ m. **e** Relative abundances of tryptophan, kynurenine, glucose,  $\gamma$ -aminobutyric acid and NAM in the NMN group and saline group of MASCP36-infected mice. Relative abundance of each metabolite in control mice was normalized to 1. All quantification data shown as mean  $\pm$  s.e.m. t test. Exact p values are indicated. n = 3 mice for each group. **f** Quantification of the density of CD68 positive cells in lung sections of saline and NAD<sup>+</sup> administrated MASCP6-infected mice. All quantification data showed as means  $\pm$  s.e.m, t test. \*p < 0.05, \*\*\*\*p < 0.0001. n = 4 mice for each group.



**Supplementary Figure 7. Treatment of MASCP36 induced pneumonia with NMN and NAD<sup>+</sup> in aged mice (8-9 months old).** **a** Bar plot indicates the expression levels of viral RNA detected by qPCR in the lungs of saline, NMN administrated MASCP36-infected aged mice (8-9 months old). **b** Heat map shows relative abundance of significantly differential metabolites ( $p < 0.05$ ;  $FC < 0.8$  or  $FC > 1.25$ ) in the saline group of MASCP36-infected mice compared with control mice. **c** KEGG analysis of significantly differential metabolites in the saline group of MASCP36-infected mice compared with control mice. **d** KEGG analysis of significantly differential metabolites in the NMN group compared with saline group of MASCP36-infected mice. **e** Absolute quantification of NAD<sup>+</sup>, NMN, NR, NAM and NA in the NMN group and saline group of MASCP36-infected mice and control mice. All quantification data showed as means  $\pm$  s.e.m. Mann Whitney test for NA, and t test for others.  $n = 3$  mice for each group. Exact p values are indicated.
